# Supplementary material for: Deep Sequencing of Maize Small RNAs Reveals a Diverse Set of MicroRNA in Dry and Imbibed Seeds
Source: PLoS One. 2013 Jan 24;8(1):e55107. doi: 10.1371/journal.pone.0055107 (PMC3554676; doi:10.1371/journal.pone.0055107)
Supplement: Additional File S1 — Conserved miRNAs in maize. These miRNA are conserved in maize and have been reported in miRBase. DS, dry seed; GS: imbibed seed, ‘+’: present in our dataset; ‘−’, absent in our dataset; L, length; **, miRNA sequences of maize were identical to those in other species; *, maize miRNA sequences were conserved in other species but have variations in some nucleotide positions. (XLS) [file pone.0055107.s001.xls]

## Sheet: Sheet1
Addisional file S1: Maize conserved miRNAs
					DS					GS
assigned name	miRNA sequence	length	Coordinates	Gene family	this paper	Total reads	miRNA*	this paper	Total reads	this paper	Total reads	miRNA*	this paper	Total reads	Conserved in other plants
															Arabidopsis	Rice	Populus
zma-MIR156a	ugacagaagagagugagcac	20	AZM5_87484: 918-1069[+]	MIR156	+	458507	gcucacuucucucucugucagu	-		+	396203	gcucacuucucucucugucagu	-		**	**	**
zma-MIR156b	ugacagaagagagugagcac	20	AZM5_110688: 373-496[+]	MIR156	+	517332	gcucacccucuaucugucagu	-		+	436281	gcucacccucuaucugucagu	+	2	**	**	**
zma-MIR156c	ugacagaagagagugagcac	20	AZM5_110688: 72-210 [+]	MIR156	+	458500	unknown	-		+	395902	unknown	-		**	**	**
zma-MIR156d	ugacagaagagagugagcac	20	AZM5_20798: 2340-2458 [-]	MIR156	+	517422	gcucacuucucuuucugucagc	+	48	+	436396	gcucacuucucuuucugucagc	+	32	**	**	**
zma-MIR156e	ugacagaagagagugagcac	20	AZM5_31310: 947-1072 [-]	MIR156	+	457523	gcucacugcucucucugucauc	-		+	395877	gcucacugcucucucugucauc	+	1	**	**	**
zma-MIR156f	ugacagaagagagugagcac	20	AZM5_87248: 3516-3682 [-]	MIR156	+	457542	gcucacuucucuuucugucagc	+	46	+	395560	gcucacuucucuuucugucagc	+	29	**	**	**
zma-MIR156g	ugacagaagagagugagcac	20	AZM5_91925: 848-968 [+]	MIR156	+	457542	gcucacuucucuuucugucagc	+	46	+	395559	gcucacuucucuuucugucagc	+	29	*	**	*
zma-MIR156h	ugacagaagagagugagcac	20	AZM5_85653: 1462-1576 [+]	MIR156	+	457542	gcucacugcucuuucugucauc	+	16	+	395877	gcucacugcucuuucugucauc	+	18	**	**	*
zma-MIR156i	ugacagaagagagugagcac	20	AZM5_87794: 1847-1963 [+]	MIR156	+	457542	gcucacugcucuaucugucauc	+	13	+	395878	gcucacugcucuaucugucauc	+	32		**	*
zma-MIR156j	ugacagaagagagagagcaca	21	AZM5_16929: 2446-2570 [+]	MIR156	+	929	ugcucucugcucucacugucauc	-		+	181	ugcucucugcucucacugucauc	-			*	*
zma-MIR156k	ugacagaagagagcgagcac	20	AZM5_86469: 1071-1193 [+]	MIR156	+	6191	gcucgcuucucuuucugucagc	-		+	5595	gcucgcuucucuuucugucagc	+	2		*	**
zma-MIR156l	ugacagaagagagugagcac	20	unknown	MIR156	+	457523	gcucacugcucuaucugucacc	+	95	+	395853	gcucacugcucuaucugucacc	+	82		*
zma-MIR159a	uuuggauugaagggagcucug	21	AZM5_100524: 164-409 [+]	MIR159	+	1948	gagcuccuaucauuccaauga	-		+	230	gagcuccuaucauuccaauga	+	2	*	**	*
zma-MIR159b	uuuggauugaagggagcucug	21	PUGAR05TB: 192-412 [+]	MIR159	+	1946	ugcucccuucaaaccaauaa	-		+	228	ugcucccuucaaaccaauaa	-		*	**	*
zma-MIR159c	cuuggauugaagggagcuccu	21	AZM5_30647: 587-803 [+]	MIR159	-		gagcucccuucgauccaaucc	-		-		gagcucccuucgauccaaucc	-		**	*	*
zma-MIR159d	cuuggauugaagggagcuccu	21	AZM5_88281: 1455-1671 [-]	MIR159	-		gagcucccuucgauccaaucc	-		-		gagcucccuucgauccaaucc	-			*	**
zma-MIR159e	auugguuugaagggagcucca	21	AZM5_85941: 2409-2535 [-]	MIR159	-		cagcuccugcagcaucuguuc	-		-		cagcuccugcagcaucuguuc	-			*	*
zma-MIR159f	uuuggauugaagggagcucug	21	AZM5_97000: 198-412 [+]	MIR159	+	1948	gagcuccucucauuccaauga	-		+	228	gagcuccucucauuccaauga	-			*	*
zma-MIR159g	uuuggagugaagggaguucug	21	AZM5_40780: 373-624 [+]	MIR159	-		gugcucccuucacaccaauaa	-		-		gugcucccuucacaccaauaa	-
zma-MIR159h	uuuggagugaagggagcucug	21	unknown	MIR159	-		gugcucccuucacaccaauaa	-		-		gugcucccuucacaccaauaa	-
zma-MIR159i	uuuggagugaagggagcucug	21	unknown	MIR159	-		gugcucccuucacaccaauaa	-		-		gugcucccuucacaccaauaa	-
zma-MIR159j	uuuggauugaagggagcucug	21	unknown	MIR159	+	1946	gugcucccuucaaaccaauaa	-		+	226	gugcucccuucaaaccaauaa	-
zma-MIR159k	uuuggauugaagggagcucug	21	unknown	MIR159	+	1946	gugcucccuucaaaccaauaa	-		+	226	gugcucccuucaaaccaauaa	-
zma-MIR160a	ugccuggcucccuguaugcca	21	unknown	MIR160	+	79	gcgugcaaggggccaagcaug	+	2	+	40	gcgugcaaggggccaagcaug	+	29	**	**	**
zma-MIR160b	ugccuggcucccuguaugcca	21	AZM5_10641: 2429-2549 [+]	MIR160	+	79	gcgugcaaggagccaagcaug	+	6	+	39	gcgugcaaggagccaagcaug	+	27	**	**	*
zma-MIR160c	ugccuggcucccuguaugcca	21	AZM5_68555: 990-1089 [+]	MIR160	+	79	gcgugcauggugccaagcaua	-		+	39	gcgugcauggugccaagcaua	-		**	**	*
zma-MIR160d	ugccuggcucccuguaugcca	21	AZM5_104998: 1039-1180 [-]	MIR160	+	79	gcgugcguggagccaagcaug	-		+	39	gcgugcguggagccaagcaug	-			**	*
zma-MIR160e	ugccuggcucccuguaugcca	21	AZM5_102077: 1396-1489 [+]	MIR160	+	79	unknown	-		+	39	unknown	-			*	**
zma-MIR160f	ugccuggcucccuguaugccg	21	AZM5_106515: 1084-1199 [-]	MIR160	-		gcgugcgaggugccaggcaug	-		-	0	gcgugcgaggugccaggcaug	-			*	*
zma-MIR160g	ugccuggcucccuguaugcca	21	unknown	MIR160	+	79	gcgugcaaggagccaagcaug	+	6	+	39	gcgugcaaggagccaagcaug	+	27			**
zma-MIR162	ucgauaaaccucugcaucca	20	AZM5_30163: 1655-1784 [-]	MIR162_2	+	4	gggcgcagugguuuaucgauc	-		+	8	gggcgcagugguuuaucgauc	-		*	*	*
zma-MIR164a	uggagaagcagggcacgugca	21	AZM5_89501: 1559-1710 [-]	MIR164	+	1129	cacguguucuccuucuccauc	-		+	913	cacguguucuccuucuccauc	-		**	**	**
zma-MIR164b	uggagaagcagggcacgugca	21	AZM5_18148: 450-577 [+]	MIR164	+	1129	augugcccaucuucuccacc	-		+	913	augugcccaucuucuccacc	-		**	**	**
zma-MIR164c	uggagaagcagggcacgugca	21	AZM5_90105: 2050-2319 [+]	MIR164	+	1129	caugugcccuucuucuccauc	-		+	913	caugugcccuucuucuccauc	-		*	**	**
zma-MIR164d	uggagaagcagggcacgugca	21	AZM5_11089: 1412-1627 [+]	MIR164	+	1129	cacguggucuccuucuccau	-		+	913	cacguggucuccuucuccau	+	1		*	**
zma-MIR164e	uggagaagcaggacacgugag	21	AZM5_107773: 68-183 [-]	MIR164	+	37487	cauguguccgcccucuccacc	-		+	14317	cauguguccgcccucuccacc	+	5		**	*
zma-MIR164f	uggagaagcagggcacgugcu	21	PUEKA67TD: 129-236 [-]	MIR164	+	29	cacgugcgcuccuucuccaac	-		+	41	cacgugcgcuccuucuccaac	-			*	**
zma-MIR164g	uggagaagcagggcacgugca	21	unknown	MIR164	+	1074	cacgugcuccccuucuccacc	-		+	871	cacgugcuccccuucuccacc	-
zma-MIR164h	uggagaagcagggcacgugug	21	unknown	MIR164	-		caugugcccuucuucuccauc	-		-		caugugcccuucuucuccauc	-
zma-MIR166a	ucggaccaggcuucauucccc	21	AZM5_106194: 1911-2123 [-]	MIR166	+	426340	ggaauguugucuggcucgggg	+	2	+	278549	ggaauguugucuggcucgggg	+	50	**	**	**
zma-MIR166b	ucggaccaggcuucauuccc	20	unknown	MIR166	+	426286	ggaauguugucugguucaagg	+	8	+	278549	ggaauguugucugguucaagg	+	23	*	*	*
zma-MIR166c	ucggaccaggcuucauuccc	20	AZM5_92263: 3084-3175 [-]	MIR166	+	426286	ggaauguugucuggcucgagg	+	12	+	278549	ggaauguugucuggcucgagg	+	58	*	*	*
zma-MIR166d	ucggaccaggcuucauuccc	20	AZM5_16740: 2532-2635 [+]	MIR166	+	426286	ggaauguugucugguucaagg	+	8	+	278549	ggaauguugucugguucaagg	+	23	*	*	*
zma-MIR166e	ucggaccaggcuucauuccc	20	AZM5_6472: 177-263 [+] AZM5_6473: 1159-1245 [+]	MIR166	+	426286	unknown	-		+	278549	unknown	-		*	*	*
zma-MIR166f	ucggaccaggcuucauuccc	20	AZM5_37985: 566-643 [+]	MIR166	+	424997	unknown	-		+	277863	unknown	-		*	*	*
zma-MIR166g	ucggaccaggcuucauuccc	20	unknown	MIR166	+	424991	ggaauguugucugguuggaga	-		+	277855	ggaauguugucugguuggaga	+	23	*	*	*
zma-MIR166h	ucggaccaggcuucauuccc	20	AZM5_12831: 3380-3455 [+]	MIR166	+	424997	ggaaugacguccgguccgaac	-		+	277863	ggaaugacguccgguccgaac	-			*	*
zma-MIR166i	ucggaccaggcuucauuccc	20	AZM5_22931: 1050-1132 [-]	MIR166	+	426207	ggaaugucgucuggcgcgaga	-		+	278526	ggaaugucgucuggcgcgaga	-			*	*
zma-MIR166j	ucggaccaggcuucaaucccu	21	AZM5_95567: 2624-2777 [-]	MIR166	+	685	gguuuguuugucugguucaagg	-		+	401	gguuuguuugucugguucaagg	-			*	*
zma-MIR166k	ucggaccaggcuucaaucccu	21	AZM5_18309: 1095-1262 [+]	MIR166	+	685	ggauuguugucuggcucgggg	-		+	401	ggauuguugucuggcucgggg	-			**	*
zma-MIR166l	ucggaccaggcuucauuccuc	21	AZM5_6103: 1425-1561 [-]	MIR166	+	12071	gaauggaggcugguccaaga	-		+	16165	gaauggaggcugguccaaga	-			*	*
zma-MIR166m	ucggaccaggcuucauuccuc	21	AZM5_18309: 836-991 [+]	MIR166	+	10311	ggaauguuggcuggcucgagg	-		+	25592	ggaauguuggcuggcucgagg	-			*	*
zma-MIR166n	ucggaccaggcuucaaucccu	21	unknown	MIR166	+	685	ggauuguugucuggcucggug	-		+	401	ggauuguugucuggcucggug	-			*	*
zma-MIR167a	ugaagcugccagcaugaucua	21	AZM5_87274: 2790-2979 [-]	MIR167_1	+	27356	gaucaugcaugacagccucauu	+	8	+	7627	gaucaugcaugacagccucauu	+	2	**	**	*
zma-MIR167b	ugaagcugccagcaugaucua	21	AZM5_20470: 844-970 [-] PUGHC59TB: 489-615 [+]	MIR167_1	+	21900	gaucaugcugugacaguuucacu	+	3	+	7620	gaucaugcugugacaguuucacu	+	7	**	**	**
zma-MIR167c	ugaagcugccagcaugaucua	21	AZM5_4164: 3726-3857 [-]	MIR167_1	+	21953	gaucaugcuguggcagccucacu	-		+	7627	gaucaugcuguggcagccucacu	+	3	*	**	**
zma-MIR167d	ugaagcugccagcaugaucua	21	AZM5_88477: 2302-2434 [+]	MIR167_1	+	21953	ggucaugcugcugcagccucacu	-		+	7627	ggucaugcugcugcagccucacu	-		*	*	**
zma-MIR167e	ugaagcugccagcaugaucug	21	AZM5_86383: 3922-4040 [+]	MIR167_1	+	3854	gaucaugcugugcaguuucauc	-	6	+	3415	gaucaugcugugcaguuucauc	-			**	**
zma-MIR167f	ugaagcugccagcaugaucug	21	AZM5_23472: 1299-1417 [+] PUFUO77TB: 212-330 [-]	MIR167_1	+	3854	gaucgugcugcgcaguuucacc	-		+	3416	gaucgugcugcgcaguuucacc	-			**	*
zma-MIR167g	ugaagcugccagcaugaucug	21	AZM5_87274: 774-1016 [-]	MIR167_1	+	3516	ggucaugcuguaguuucauc	-		+	3380	ggucaugcuguaguuucauc	+	2		**	*
zma-MIR167h	ugaagcugccagcaugaucug	21	AZM5_3487: 586-728 [+]	MIR167_1	+	3965	gaucauguugcagcuucac	+	4153	+	4140	gaucauguugcagcuucac	+	3117		**	**
zma-MIR167i	ugaagcugccagcaugaucug	21	unknown	MIR167_1	+	3967	gaucauguugcagcuucac	+	4153	+	4143	gaucauguugcagcuucac	+	3117		**
zma-MIR167j	ugaagcugccagcaugaucug	21	AZM5_87414: 5259-5367 [-]	MIR167_1	+	3859	gaucauguggcaguuucauu	+	45	+	3416	gaucauguggcaguuucauu	+	13		**
zma-MIR168a	ucgcuuggugcagaucgggac	21	AZM5_2488: 1559-1662 [-]	MIR168	+	189773	cccgccuugcaccaagugaa	+	82	+	53965	cccgccuugcaccaagugaa	+	25	*	**	*
zma-MIR168b	ucgcuuggugcagaucgggac	21	AZM5_2487: 4747-4850 [-]	MIR168	+	189773	cccgccuugcaucaagugaa	+	64	+	53965	cccgccuugcaucaagugaa	+	34	*	*	*
zma-MIR169a	cagccaaggaugacuugccga	21	AZM5_29488: 2051-2180 [-]	MIR169_2	+	2368	ggcaaguuguucuuggcuaca	+	626	+	901	ggcaaguuguucuuggcuaca	+	394	**	**	**
zma-MIR169b	cagccaaggaugacuugccga	21	AZM5_12846: 1410-1565 [+]	MIR169_2	+	2047	ggcaaguuguucuuggcuaca	+	617	+	89	ggcaaguuguucuuggcuaca	+	391	*	*	**
zma-MIR169c	cagccaaggaugacuugccgg	21	AZM5_31702: 1467-1600 [-]	MIR169_2	+	170	ggcaagucuguccuuggcuaca	+	45	+	98	ggcaagucuguccuuggcuaca	+	18	**	**	*
zma-MIR169d	uagccaaggagacugccuaug	21	AZM5_30170: 1475-1602 [-]	MIR169_5	-		unknown	-		-		unknown	-		*	*	*
zma-MIR169e	uagccaaggagacugccuacg	21	AZM5_23573: 1908-2035 [+]	MIR169_5	-		unknown	-		-		unknown	-		*	*	*
zma-MIR169f	uagccaaggaugacuugccua	21	AZM5_89448: 1385-1534 [+]	MIR169_1	-		ggcaugucuuccuuggcuacu	-		-		ggcaugucuuccuuggcuacu	-		*	**	*
zma-MIR169g	uagccaaggaugacuugccua	21	AZM5_120822: 494-633 [+]	MIR169_1	-		unknown	-		-		unknown	-		*	**	*
zma-MIR169h	uagccaaggaugacuugccua	21	AZM5_23573: 1909-2036 [-]	MIR169_1	-		unknown	-		-		unknown	-		*	*	*
zma-MIR169i	uagccaaggaugacuugccug	21	AZM5_94113: 1587-1777 [-]	MIR169_1	+	38	ggcagucuccuuggcuag	+	111	+	75	ggcagucuccuuggcuag	+	34	**	**	**
zma-MIR169j	uagccaaggaugacuugccug	21	AZM5_6123: 1244-1394 [+]	MIR169_1	+	36	ggcagucuccuuggcuag	-		+	72	ggcagucuccuuggcuag	+	1	**	**	**
zma-MIR169k	uagccaaggaugacuugccug	21	AZM5_92441: 776-908 [+]	MIR169_1	+	38	ggcagucuccuuggcuag	+	154	+	75	ggcagucuccuuggcuag	+	52	**	**	**
zma-MIR169l	uagccagggaugauuugccug	21	PUFIT66TD: 462-550 [-]	MIR169	-		ggcaaaucaucccugcuacc	-		-		ggcaaaucaucccugcuacc	-		**	**	**
zma-MIR169m	uagccaagaauggcuugccua	21	AZM5_39868: 826-926 [+]	MIR169_7	-		ggcauccauucuuggcuaag	-		-		ggcauccauucuuggcuaag	-		*	*	**
zma-MIR169n	uagccaagaauggcuugccua	21	unknown	MIR169_7	-		ggcaggccuucuuggcuaag	-		-		ggcaggccuucuuggcuaag	-		*	**	*
zma-MIR169o	uagccaagaaugacuugccua	21	unknown	MIR169	+	2237	ggcaggucuucuuggcuagc	+	52	+	1009	ggcaggucuucuuggcuagc	+	41		**	**
zma-MIR169p	uagccaaggaugacuugccgg	21	AZM5_28067: 1678-1742 [-]	MIR169_1	+	3	ggcaagucaucuggggcuacg	-		+	7	ggcaagucaucuggggcuacg	-			**	*
zma-MIR169q	uagccaagaauggcuugccua	21	AZM5_77627: 859-964 [+]	MIR169_7	-		ggcaggccuucuggcuaag	-		-		ggcaggccuucuggcuaag	-			*	*
zma-MIR169r	cagccaaggaugacuugccgg	21	unknown	MIR169_2	+	148	ggcaaguuguccuuggcuaca	-		+	168	ggcaaguuguccuuggcuaca	-				*
zma-MIR171a	ugauugagccgcgccaauau	20	AZM5_97187: 79-177 [-]	MIR171_1	-		uauuggcgagguucaaucaga	-		-		uauuggcgagguucaaucaga	-		*	*	*
zma-MIR171b	uugagccgugccaauaucac	20	AZM5_6853: 1391-1475 [-]	MIR171_1	+	120	gauauuggcgcgguucaauc	-		+	57	gauauuggcgcgguucaauc	-		*	*	*
zma-MIR171c	ugacugagccgugccaauauc	21	AZM5_14183: 4948-5065 [+]	MIR171_1	-		uauuggugcgguucaaucaga	-		-		uauuggugcgguucaaucaga	-		*	**	*
zma-MIR171d	ugauugagccgugccaauauc	21	AZM5_21613: 2475-2595 [-]	MIR171_1	+	120	uguuggcucggcucacucaga	+	3	+	58	uguuggcucggcucacucaga	+	34		**	*
zma-MIR171e	ugauugagccgugccaauauc	21	AZM5_28624: 579-704 [-]	MIR171_1	+	120	uguuggcucggcucacucaga	+	3	+	58	uguuggcucggcucacucaga	+	34		**	**
zma-MIR171f	uugagccgugccaauaucaca	21	AZM5_24822: 857-1011 [-]	MIR171_1	+	120	cgauguuggcauggcucaauc	-		+	57	cgauguuggcauggcucaauc	-			*	*
zma-MIR171g	gaggugagccgagccaauauc	21	AZM5_20626: 1292-1403 [-]	MIR171_2	-		uauugacuuggcucaucucuc	-		-		uauugacuuggcucaucucuc	-			**	*
zma-MIR171h	gugagccgaaccaauaucacu	21	AZM5_85240: 2887-3010 [-]	MIR171_2	+	4	ugguauuguuucggcucaugu	-		+	10	ugguauuguuucggcucaugu	+	1		**	*
zma-MIR171i	ugauugagccgugccaauauc	21	AZM5_87144: 1830-1933 [-]	MIR171_1	+	120	uguuggcacgguucaaucaaa	-		+	57	uguuggcacgguucaaucaaa	-			*	**
zma-MIR171j	ugauugagccgugccaauauc	21	AZM5_88124: 960-1088 [-]	MIR171_1	+	120	uauugacgcgguucaauucga	-		+	58	uauugacgcgguucaauucga	-				*
zma-MIR171k	gugagccgaaccaauaucacu	21	AZM5_34528: 1131-1234 [+]	MIR171_2	+	4	ugguauuguuucggcucaugu	-		+	10	ugguauuguuucggcucaugu	+	1			*
zma-MIR171l	ggauugagccgcgucaauauc	21	AZM5_24556: 2205-2282 [-]	MIR171_1	+	10	auuggcgugccucaauccga	-		+	40	auuggcgugccucaauccga	-				*
zma-MIR171m	ggauugagccgcgucaauauc	21	AZM5_34095: 1072-1153 [-]	MIR171_1	+	10	uauuggcgcgccucaauccga	-		+	40	uauuggcgcgccucaauccga	+	1			*
zma-MIR171n	ugauugagccgcgccaauauc	21	unknown	MIR171_1	-		uauuggugagguucaauccga	-		-		uauuggugagguucaauccga	-				*
zma-MIR172a	agaaucuugaugaugcugca	20	unknown	MIR172	+	51	unknown	-		+	20	unknown	-		*	*	*
zma-MIR172b	agaaucuugaugaugcugca	20	AZM5_29626: 1060-1185 [-]	MIR172	+	51	cagcaccaucaagauucaca	-		+	20	cagcaccaucaagauucaca	-		*	*	*
zma-MIR172c	agaaucuugaugaugcugca	20	AZM5_12744: 3033-3155 [-]	MIR172	+	51	cagcaccaccaagauucaca	-		+	20	cagcaccaccaagauucaca	-		*	*	*
zma-MIR172d	agaaucuugaugaugcugca	20	AZM5_135519: 489-562 [-]	MIR172	+	51	cagcaccaucaagauucaca	-		+	20	cagcaccaucaagauucaca	-		*	*	*
zma-MIR172e	ggaaucuugaugaugcugcau	21	AZM5_94137: 230-403 [+]	MIR172	+	12	unknown	-		+	8	unknown	-		**		**
zma-MIR319a	uuggacugaagggugcuccc	20	AZM5_88200: 2592-2800 [-]	MIR319	+	1293	gagcucucuucaguccacuc	-		+	504	gagcucucuucaguccacuc	-		*	**	*
zma-MIR319b	uuggacugaagggugcuccc	20	AZM5_11545: 3551-3763 [-]	MIR319	+	1322	agagcguccuucaguccacuc	-		+	629	agagcguccuucaguccacuc	-		*	**	*
zma-MIR319c	uuggacugaagggugcuccc	20	AZM5_22961: 667-882 [-]	MIR319	+	1213	gagcucucuucaguccacuc	-		+	504	gagcucucuucaguccacuc	-		*		*
zma-MIR319d	uuggacugaagggugcuccc	20	AZM5_86015: 514-725 [+]	MIR319	+	1317	agagcguccuucaguccacuc	-		+	629	agagcguccuucaguccacuc	-				*
zma-MIR390a	aagcucaggagggauagcgcc	21	AZM5_16457: 437-617 [-]	MIR390	+	283	cgcuaucuauccugagcucca	+	5	+	238	cgcuaucuauccugagcucca	+	2	**	**	**
zma-MIR390b	aagcucaggagggauagcgcc	21	unknown	MIR390	+	283	cgcuaucuauccugagcucca	+	5	+	238	cgcuaucuauccugagcucca	+	2	**		**
zma-MIR393a	uccaaagggaucgcauugaucu	22	AZM5_11037: 365-490 [+]	MIR393	+	282	aucagugcaaucccuuuggaau	+	14	+	48	aucagugcaaucccuuuggaau	+	7	*	*	*
zma-MIR393b	uccaaagggaucgcauugaucc	22	AZM5_11829: 3329-3436 [-]	MIR393	+	57	aucaaugcgauccuuuuggagg	-		+	23	aucaaugcgauccuuuuggagg	-		**	*	*
zma-MIR393c	uccaaagggaucgcauugaucu	22	unknown	MIR393	+	282	gucagugcaaucccuuuggaau	+	14	+	48	gucagugcaaucccuuuggaau	+	7			*
zma-MIR394a	uuggcauucuguccaccucc	20	AZM5_91584: 1085-1210 [-]	MIR394	+	33	aggugggcauacugccaaug	-		+	6	aggugggcauacugccaaug	-		**	**	**
zma-MIR394b	uuggcauucuguccaccucc	20	AZM5_93985: 1335-1456 [-]	MIR394	+	33	aggugggcauacugccaaug	-		+	6	aggugggcauacugccaaug	-		**		**
zma-MIR395a	gugaaguguuugggggaacuc	21	AZM5_4387: 959-1107 [-]	MIR395	-		guucuccucaaaccacuucaguu	-		-		guucuccucaaaccacuucaguu	-		*	**	*
zma-MIR395b	gugaaguguuugggggaacuc	21	AZM5_4387: 304-417 [-]	MIR395	-		guucccuacaagcacuucacaa	-		-		guucccuacaagcacuucacaa	-		*	**	*
zma-MIR395c	gugaaguguuuggaggaacuc	21	AZM5_29894: 228-365 [-]	MIR395	-		guucccugcaaacacuucacca	-		-		guucccugcaaacacuucacca	-		*	**	*
zma-MIR395d	gugaaguguuugggggaacuc	21	unknown	MIR395	-		guucuaugcaagcacuucacga	-		-		guucuaugcaagcacuucacga	-		*	**	*
zma-MIR395e	gugaaguguuugggggaacuc	21	AZM5_4387: 145-229 [-]	MIR395	-		guucccuucaagcacuucacau	-		-		guucccuucaagcacuucacau	-		*	**	*
zma-MIR395f	gugaaguguuugggggaacuc	21	unknown	MIR395	-		guuaccuacaagcacgucucga	-		-		guuaccuacaagcacgucucga	-		*	**	*
zma-MIR395g	gugaaguguuugggggaacuc	21	unknown	MIR395	-		guucuaugcaagcacuucacga	-		-		guucuaugcaagcacuucacga	-			**	*
zma-MIR395h	gugaaguguuugggggaacuc	21	unknown	MIR395	-		guucccuucaagcacuucacau	-		-		guucccuucaagcacuucacau	-			**	*
zma-MIR395i	gugaaguguuugggggaacuc	21	unknown	MIR395	-		guucccuacaagcacuucacga	-		-		guucccuacaagcacuucacga	-			**	*
zma-MIR395j	gugaaguguuugggggaacuc	21	unknown	MIR395	-		guucccuucaagcacuucacau	-		-		guucccuucaagcacuucacau	-			**	*
zma-MIR395k	gugaaguguuugaggaaacuc	21	AZM5_59970: 204-287 [-]	MIR395	-		guuuccuucaagcacuucacau	-		-		guuuccuucaagcacuucacau	-			**
zma-MIR395l	gugaaguguuuggaggaacuc	21	unknown	MIR395	-		guuccuuccaaacacuucacca	-		-		guuccuuccaaacacuucacca	-			**
zma-MIR395m	gugaaguguuuggaggaacuc	21	AZM5_29894: 82-163 [-]	MIR395	-		guuccuuucaaacacuucacau	-		-		guuccuuucaaacacuucacau	-			**
zma-MIR395n	gugaaguguuugggggaacuc	21	unknown	MIR395	-		guucucuacaagcacuucacga	-		-		guucucuacaagcacuucacga	-			**
zma-MIR395o	gugaaguguuugggugaacuc	21	unknown	MIR395	-		guucucuucaagcacuucacga	-		-		guucucuucaagcacuucacga	-			*
zma-MIR395p	gugaaguguuugggggaacuc	21	OGCCN13TM: 335-423 [-]	MIR395	-		guucccuucaagcacuucacau	-		-		guucccuucaagcacuucacau	-			**
zma-MIR396a	uuccacagcuuucuugaacug	21	AZM5_85157: 518-654 [+]	MIR396	+	66	guucaauaaagcugugggaaa	+	61	+	90	guucaauaaagcugugggaaa	+	151	**	**	**
zma-MIR396b	uuccacagcuuucuugaacug	21	AZM5_12137: 2050-2185 [-]	MIR396	+	66	guucaauaaagcugugggaaa	+	61	+	90	guucaauaaagcugugggaaa	+	151	*	**	**
zma-MIR396c	uuccacaggcuuucuugaacug	22	AZM5_11578: 2280-2353 [-]	MIR396	+	300	unknown	-		+	229	unknown	-			*	*
zma-MIR396d	uuccacaggcuuucuugaacug	22	AZM5_13014: 2744-2817 [+]	MIR396	+	300	unknown	-		+	229	unknown	-			*	*
zma-MIR396e	uuccacagcuuucuugaacuu	21	AZM5_7543: 348-513 [-]	MIR396	-		ggucaagaaagccgugggaag	-		-		ggucaagaaagccgugggaag	-			*	**
zma-MIR396f	uuccacagcuuucuugaacuu	21	AZM5_23895: 980-1096 [+]	MIR396	-		ggucaagaaagcugugggaag	+	7	-		ggucaagaaagcugugggaag	+	10		*	*
zma-MIR396g	ucccacagcuuuauugaacug	21	PUIBX76TB: 151-264 [+]	MIR396	-		guucaagaaagcuguggaaga	-		-		guucaagaaagcuguggaaga	-			*	*
zma-MIR396h	ucccacagcuuuauugaacug	21	AZM5_12137: 2068-2191 [+]	MIR396	-		unknown	-		-		unknown	-			*
zma-MIR397a	ucauugagcgcagcguugaug	21	AZM5_17450: 1288-1430 [+]	MIR397	+	3802	uagccguuagcgcucauuaacu	-		+	415	uagccguuagcgcucauuaacu	-		**	**	**
zma-MIR397b	ucauugagcgcagcguugaug	21	AZM5_30028: 582-665 [+]	MIR397	+	5240	ccagcgcugcacucaauuacg	+	7736	+	893	ccagcgcugcacucaauuacg	+	10727	**	*	*
zma-MIR398a	uguguucucaggucgcccccg	21	AZM5_13076: 1218-1357 [-]	MIR398_2	+	273	ggggcgaacugagaacacaug	+	4	+	242	ggggcgaacugagaacacaug	+	1	*	*	*
zma-MIR398b	uguguucucaggucgcccccg	21	AZM5_104861: 946-1053 [+]	MIR398_2	+	273	ggggcggacugggaacacaug	+	100	+	547	ggggcggacugggaacacaug	+	103	*	*	*
zma-MIR399a	ugccaaaggagaauugcccug	21	AZM5_3373: 2340-2462 [+]	MIR399	-		gugcgguucuccucuggcacg	-		-		gugcgguucuccucuggcacg	-		**	**	*
zma-MIR399b	ugccaaaggagagcuguccug	21	AZM5_22197: 1929-2050 [-]	MIR399	-		gugcagcucuccucuggcaug	-		-		gugcagcucuccucuggcaug	-		*	*	*
zma-MIR399c	ugccaaaggagaauugcccug	21	AZM5_27029: 2305-2511 [-]	MIR399	-		ggguacgucuccuuuggcaca	-		-		ggguacgucuccuuuggcaca	-		**	**	*
zma-MIR399d	ugccaaaggagagcugcccug	21	AZM5_96064: 926-1050 [+]	MIR399	-		guguggcucuccucuggcaug	-		-		guguggcucuccucuggcaug	-		*	**	*
zma-MIR399e	ugccaaaggagaguugcccug	21	AZM5_12789: 2354-2477 [-]	MIR399	+	5	gggcuucucuuucuuggcagg	-		+	4	gggcuucucuuucuuggcagg	-		*	*	*
zma-MIR399f	ugccaaaggaaauuugccccg	21	AZM5_9932: 7989-8093 [-]	MIR399	-		gggcaacuucuccuuuggcaga	-		-		gggcaacuucuccuuuggcaga	-		*	*	*
zma-MIR399g	ugccaaaggggauuugcccgg	21	AZM5_3373: 1195-1262 [-]	MIR399	-		gggcaaccccccguuggcagg	-		-		gggcaaccccccguuggcagg	-			*	*
zma-MIR399h	ugccaaaggagaauugcccug	21	ZCANM19TR: 434-527 [-]	MIR399	-		gugcaguucuccucuggcacg	-		-		gugcaguucuccucuggcacg	-			*	**
zma-MIR399i	ugccaaaggagaguugcccug	21	AZM5_9776: 1052-1142 [+]	MIR399	+	5	gugcggcucuccucuggcaug	-		+	4	gugcggcucuccucuggcaug	-			**	*
zma-MIR399j	ugccaaaggagaguugcccug	21	AZM5_113227: 331-505 [-]	MIR399	+	5	aggcagcucuccucuggcagg	-		+	4	aggcagcucuccucuggcagg	-			*	*
zma-MIR408	cugcacugccucuucccuggc	21	AZM5_41281: 245-435 [+]	MIR408	+	2148	unknown	-		+	1133	unknown	-		*	**	*
zma-MIR408b	cugcacugccucuucccuggc	21	AZM5_94352: 604-750 [-]	MIR408	+	2148	cagggacgaggcagagcaugg	+	362	+	1132	cagggacgaggcagagcaugg	+	215			*
zma-MIR444a	ugcaguuguugucucaagcuu	21	unknown	MIR444	-		unknown	-		-			-
zma-MIR444b	ugcaguuguugucucaagcuu	21	unknown	MIR444	-		unknown	-		-			-
zma-MIR482	ucuuccuuguuccucccauu	20	unknown	MIR482	-		ugggagaugaaggagccuu	-		-		ugggagaugaaggagccuu	-				*
zma-MIR528a	uggaaggggcaugcagaggag	21	AZM5_24958: 1301-1423 [+]	MIR528	+	196757	ccugugccugccucuuccauu	-		+	532783	ccugugccugccucuuccauu	-			**
zma-MIR528b	uggaaggggcaugcagaggag	21	AZM5_24327: 2884-2961 [+]	MIR528	+	214192	ccugugccugccucuuccauu	-		+	559741	ccugugccugccucuuccauu	-
zma-MIR529	agaagagagagaguacagccu	21	unknown	MIR529_2	+	92	gcuguacccucucucuucuuc	-		+	135	gcuguacccucucucuucuuc	+	5		*
zma-MIR827	uuagaugaccaucagcaaaca	21	AZM5_27266: 1500-1621 [-]	MIR827	+	1198	uuuguugguggucauuuaacc	+	548	+	1259	uuuguugguggucauuuaacc	+	504	*	*	*
zma-MIR1432	cucaggagagaugacaccgac	21	AZM5_13327: 1996-2084 [-]	MIR1432	+	25	gggugucaucucgccugaagca	-		+	37	gggugucaucucgccugaagca	+	1		*
zma-MIR2118a	uuccugaugccucucauuccua	22	AZM5_28249: 457-574 [+]	MIR2118	-		unknown	-		-		unknown	-			*
zma-MIR2118b	uucccgaugccucccauuccua	22	AZM5_34940: 795-912 [+]	MIR2118	-		unknown	-		-		unknown	-			**
zma-MIR2118c	uuccuaaugccucccauuccua	22	AZM5_27613: 1654-1786 [-]	MIR2118	-		unknown	-		-		unknown	-			*
zma-MIR2118d	uuccugaugccucccaugccua	22	AZM5_34940: 987-1134 [+]	MIR2118	-		unknown	-		-		unknown	-			**
zma-MIR2118e	uuccugaugucucccauuccua	22	OG5DE33TC: 597-739 [-]	MIR2118	-		unknown	-		-		unknown	-			*
zma-MIR2118f	uucccaaugccuuccaugccua	22	OG5DE33TC: 376-495 [-]	MIR2118	-		unknown	-		-		unknown	-			*
zma-MIR2118g	uuccugaugccuccuauuccua	22	unknown	MIR2118	-		unknown	-		-		unknown	-			*
zma-MIR2275a	agaguuggaggaaagcaaacc	21	AZM5_29209: 533-654 [+]	MIR2275	-		uuuguuuuccuccaauaucuca	-		-		uuuguuuuccuccaauaucuca	-			*
zma-MIR2275b	aggauuagaggcaacugaacc	21	AZM5_29209: 689-770 [+]	MIR2275	-		uucaguuuccucuaauaucuca	-		-		uucaguuuccucuaauaucuca	-			*
zma-MIR2275c	aggauuagagggacuugaacc	21	unknown	MIR2275	-		uucaguuuccucuaauaucuca	-		-		uucaguuuccucuaauaucuca	-
zma-MIR2275d	agaguuggaggaaagaaaacu	21	AZM5_30510: 1053-1172 [-]	MIR2275	-		uuuguuuuccucuaauaucuca	-		-		uuuguuuuccucuaauaucuca	-
DS: dry seed; GS: imbibed seed; +: present in our dataset, -: absent in our dataset, L: length.
**: miRNA sequences of maize were identical to those in other species; *: maize miRNA sequences were conserved in other species but have variations in some nucleotide positions.
