# Supplementary material for: Deep Sequencing of Maize Small RNAs Reveals a Diverse Set of MicroRNA in Dry and Imbibed Seeds
Source: PLoS One. 2013 Jan 24;8(1):e55107. doi: 10.1371/journal.pone.0055107 (PMC3554676; doi:10.1371/journal.pone.0055107)
Supplement: Additional File S3 — Novel miRNAs only identified in dry seed in this study. (XLS) [file pone.0055107.s003.xls]

## Sheet: Sheet1
Additional file S3: Novel miRNAs only identified in dry seed in this study
Name	Chromosome	Location	Arm	Precursor L(nt)	Free energy (kcal/mol)	Mature sequence(5'-3')	L(nt)	Reads	Complementary sequences	Reads
zma-miRds1	chr10	12385655:12385921(+)	5p	267	-63.71	AGUCUAUAAAUGCAACUGGUCG	22	134
zma-miRds2a	chr10	15218280:15218509(+)	3p	230	-130.9	AAACCCGGUUUUGGACGGUUU	21	25
zma-miRds2b	chr1	297053045:297053273(+)	3p	229	-115.13	AAACCCGGUUUUGGACGGUUU	21	25
zma-miRds2c	chr4	54511341:54511557(+)	3p	217	-93.9	AAACCCGGUUUUGGACGGUUU	21	25
zma-miRds2d	chr5	29538403:29538619(+)	3p	217	-93.3	AAACCCGGUUUUGGACGGUUU	21	25
zma-miRds2e	chr5	178042130:178042357(+)	3p	228	-109.7	AAACCCGGUUUUGGACGGUUU	21	15
zma-miRds8	chr10	90868095:90868389(+)	3p	295	-114.7	UCCGGGAGGUAGGAUCGACGUC	22	15
zma-miRds9	chr10	94683184:94683413(+)	5p	230	-62.76	AAGCAGAAAGCAGUGCUCUGAG	22	36
zma-miRds10a	chr10	95437184:95437429(+)	5p	246	-72.62	UCUAGAUCUAACGGACCAAA	20	11
zma-miRds10b	chr10	79330831:79330995	3p	165	-63.4	UCUAGAUCUAACGGACCAAA	20	11
zma-miRds10c	chr1	282466631:282466793(+)	5p	163	-61.72	UCUAGAUCUAACGGACCAAA	20	12
zma-miRds10e	chr3	28001942:28002102(-)	3p	161	-56.6	UCUAGAUCUAACGGACCAAA	20	11
zma-miRds11	chr10	114186859:114186962(+)	5p	140	-54.5	AUGGAGUGGUUUGAGGAGGCU	21	39
zma-miRds16	chr10	12435018:12435262(-)	5p	245	-41.9	CUAUUAUUUAUCGUUUAGGAC	21	12
zma-miRds17	chr10	40266719:40267026(+)	3p	308	-83.7	UUCAGCAGUGACUCUGAUGAGA	22	12
zma-miRds18	chr10	58542923:58543125(-)	3p	203	-62.92	UAAAGUUGGUUUUCGGAUUUUU	22	156
zma-miRds20	chr10	106089265:106089515(-)	5p	251	-129.3	UUGCCGACCCGUGCAAAAUCG	21	10
zma-miRds24a	chr1	173660313:173660593(+)	3p	281	-122.9	UUGGUGACCAGGGAAAUGGAG	21	11
zma-miRds24b	chr1	173660314:173660594(-)	3p	281	-117.82	UUGGUGACCAGGGAAAUGGAG	21	11
zma-miRds24c	chr5	31669984:31670069(+)	5p	86	-61.3	UUGGUGACCAGGGAAAUGGAG	21	11
zma-miRds24d	chr9	15217763:15217886(+)	5p	124	-79.3	UUGGUGACCAGGGAAAUGGAG	21	11
zma-miRds27	chr1	179920776:179920858(+)	3p	83	-40.1	GUCUUUAUGCUGUAGGAGAGGGU	23	10
zma-miRds28	chr1	181634520:181634625(+)	5p	106	-64.6	UACAUAUGUUGUCUGCCUCACU	22	22
zma-miRds30	chr1	221282233:221282334(+)	5p	102	-61.4	AUGGAGUGGAUUGAGUGGGCU	21	10
zma-miRds33	chrPt	7477:7714(-)	3p	238	-56.3	UUCAAUGUAGAAGAAUUUUCAU	22	16
zma-miRds34c	chr5	42863762:42863858(-)	5p	97	-56.1	UUUGAAAGGGAAGUAGGGUUU	21	40
zma-miRds37a	chr1	93579637:93579943(-)	3p	307	-76.9	UAUCUGGAGGAAGAAUCGCUA	21	39
zma-miRds37b	chrMt	457113:457419(+)	3p	307	-77.51	UAUCUGGAGGAAGAAUCGCUA	21	39
zma-miRds37c	chrMt	526050:526356(+)	3p	307	-77.51	UAUCUGGAGGAAGAAUCGCUA	21	39
zma-miRds38	chr1	150498242:150498361(-)	3p	120	-40.82	GUAUCUAGAAAAGCUAAAACGA	22	10
zma-miRds39	chr1	153092026:153092372(-)	3p	347	-80.2	AAAGCUAAAAUCAAGUCGGUG	21	11
zma-miRds40a	chr1	177194991:177195346(-)	3p	356	-103.8	AUGUUAUGAUGCAUGCUUCGUU	22	381
zma-miRds40b	chr5	102172319:102172668(+)	3p	350	-94.8	AUGUUAUGAUGCAUGCUUCGUU	22	330
zma-miRds40c	chr6	80410123:80410484(+)	3p	362	-96.44	AUGUUAUGAUGCAUGCUUCGUU	22	381
zma-miRds42a	chr1	179665513:179665608(-)	3p	96	-37.8	UGGAUUAUAUAAUCUGGGUAG	21	15
zma-miRds42b	chr3	108312593:108312689(+)	3p	97	-45.4	UGGAUUAUAUAAUCUGGGUAG	21	15
zma-miRds42c	chr3	116750972:116751069(+)	3p	98	-54.1	UGGAUUAUAUAAUCUGGGUAG	21	15
zma-miRds42d	chr5	186971113:186971210(-)	3p	98	-59.3	UGGAUUAUAUAAUCUGGGUAG	21	15
zma-miRds42e	chr6	74463910:74464027(-)	3p	118	-40.44	UGGAUUAUAUAAUCUGGGUAG	21	15
zma-miRds42f	chr7	129262633:129262730(+)	3p	98	-59.3	UGGAUUAUAUAAUCUGGGUAG	21	15
zma-miRds42g	chr7	167276547:167276643(+)	3p	97	-48.3	UGGAUUAUAUAAUCUGGGUAG	21	15
zma-miRds43	chr1	181634368:181634666(-)	3p	299	-180.81	UAUCGUAAUGUUGCAAACAGAA	22	37
zma-miRds44	chr1	192284618:192284761(-)	3p	144	-24.8	UUGUAUUCAUUGAUCUCAGAAG	22	16
zma-miRds46	chr1	225252210:225252378(-)	5p	169	-103.8	UACUCUAUAAGGACUAGUUUG	21	15
zma-miRds48	chr1	228755275:228755432(-)	5p	158	-60.41	UAAGGGUCUGUUUGGUUUUU	20	10
zma-miRds50	chr1	232334812:232334951(-)	5p	140	-68	UUAGAUUAUAGUAGAAGAGUA	21	40
zma-miRds52a	chr1	234639359:234639710(-)	3p	352	-88.5	UAUGCAACAAGUAGAUUCCUGA	22	10
zma-miRds54	chr2	41902268:41902440(+)	3p	173	-51	AUAAUUUGUGUGGUUGUUUGGUU	23	12
zma-miRds57	chr2	108629040:108629331(+)	5p	292	-130.9	UAUCAUGACUGAUUGGGUUCG	21	17
zma-miRds58a	chr2	148111789:148111961(+)	5p	173	-87.2	ACAUUUUAAAUCUGGGACAUC	21	12
zma-miRds58b	chr2	21259555:21259726(-)	5p	172	-93.2	ACAUUUUAAAUCUGGGACAUC	21	12
zma-miRds58c	chr2	58466263:58466411(-)	5p	149	-71.71	ACAUUUUAAAUCUGGGACAUC	21	12
zma-miRds60a	chr2	174086712:174087058(+)	3p	347	-87.1	UUAUGCAACAAGUAGAUUCCUG	22	10
zma-miRds60b	chrMt	367214:367559(+)	3p	346	-86.7	UUAUGCAACAAGUAGAUUCCUG	22	10
zma-miRds64	chr2	210859236:210859332(+)	3p	97	-54.3	AUUUGGCAAAAUGGGUCGCUC	21	85
zma-miRds68	chr2	7090873:7091023(-)	3p	151	-65.2	UACGACUGAAGGGUAAAUUUGU	22	14
zma-miRds69	chr2	37138823:37138906(-)	5p	84	-20.3	UUUGGAGUAGAGACCGAGCGA	21	12
zma-miRds70	chr2	55902795:55902945(-)	3p	151	-34.3	AGAGGACAACAAUCGCUUUUGA	22	12
zma-miRds71	chr2	57390714:57390969(-)	3p	256	-166.4	AGGGCGAUGGCUUGCUAGACGA	22	186	GUCUAACAAGCCAUCGCCCUGC	5p	8
zma-miRds72	chr2	57459226:57459529(-)	5p	304	-91.3	UUGUUCAUAUGGGAGUGAUGUC	22	10
zma-miRds73a	chr2	63939975:63940175(-)	5p	201	-42.06	AGAUAGAGUGUUGUUUUCUGA	21	12
zma-miRds73b	chr8	77228340:77228509(+)	3p	170	-28.6	AGAUAGAGUGUUGUUUUCUGA	21	12
zma-miRds73c	chr9	153948748:153948935(+)	5p	188	-33.8	AGAUAGAGUGUUGUUUUCUGA	21	12
zma-miRds75	chr2	100497662:100497772(-)	3p	111	-25.8	UCGGUGUUUGGACUAGCGGUC	21	12
zma-miRds77	chr2	168010058:168010223(-)	3p	166	-75.6	UGCCUUGGUCGCACGGUUGCA	21	22
zma-miRds78	chr2	169517745:169517847(-)	5p	103	-54.1	CCGGAGGGGUUGAAGGUGCUA	21	52	GCUCCUCCAAUCUCCUCCGGUA	3p	2
zma-miRds79	chr2	186891039:186891293(-)	5p	255	-79.1	UUGGCAAGUAUGAGAGAGGAC	21	10
zma-miRds80	chr2	209223027:209223132(-)	3p	106	-72.7	UUCAAUCCUCCCGUGAUCUCG	21	13
zma-miRds87a	chr3	58483625:58483767(+)	3p	143	-34.2	AUAUACUAUUAUGACCUCUAA	21	30
zma-miRds87b	chr3	58483726:58483945(-)	5p	220	-111.5	AUAUACUAUUAUGACCUCUAA	21	30
zma-miRds88	chr3	59880662:59880750(+)	5p	89	-37.4	CUUGCAUGCCGGCUGUAGGGGGC	23	11
zma-miRds96	chr3	7682356:7682623(-)	5p	268	-118.6	CGGUAGUGGAAUGUGGUGGCGC	22	18
zma-miRds99	chrMt	8265:8454(-)	5p	190	-42.9	UCUGAAUAAAUAGAAUACGUAA	22	12
zma-miRds100	chr3	144745793:144746070(-)	3p	278	-72.07	AGCCAGAUUCUCGGAAAAGCU	21	10
zma-miRds101a	chr3	179796125:179796221(-)	5p	97	-61.5	UCCCCUUCGGGAUUGGAGAGG	21	10
zma-miRds101b	chr6	156248626:156248722(-)	5p	97	-42.2	UCCCCUUCGGGAUUGGAGAGG	21	10
zma-miRds101c	chr7	107840596:107840692(+)	5p	97	-43.2	UCCCCUUCGGGAUUGGAGAGG	21	10
zma-miRds102	chr3	188663000:188663088(-)	3p	89	-37.5	CCCGUUAGACAUAGAGAUGGCAA	23	24
zma-miRds103	chr3	194826511:194826613(-)	5p	103	-52.2	UGAAGUGGAUUAGAGGGGCUA	21	75
zma-miRds105	chr4	60173891:60174127(+)	5p	237	-68.1	ACCUAGUUUUUAAGAAUUUAG	21	29
zma-miRds108	chr4	168188704:168188863(+)	3p	160	-46.6	GCCUCCGUAGCAUAGUGGUAGUG	23	13
zma-miRds109	chr4	171264197:171264389(+)	5p	193	-53.9	UGAACCGUUGCCUGCUAUCCAG	22	67
zma-miRds112a	chr4	224185721:224185803(+)	3p	83	-18.8	GGGUGGUUACAGAUCGUAGGAGA	23	18
zma-miRds112b	chr6	93737227:93737449(-)	3p	223	-52.71	GGGUGGUUACAGAUCGUAGGAGA	23	18
zma-miRds114a	chr4	36408180:36408472(-)	5p	293	-140.63	ACGCACGCAGGGUCACCGGCC	21	25
zma-miRds114b	chr9	123596643:123596802(-)	5p	160	-66.7	ACGCACGCAGGGUCACCGGCC	21	25
zma-miRds115	chr4	103959564:103959688(-)	5p	125	-38.2	AGCGACUACAGAGGACCGUCAA	22	41
zma-miRds116	chr4	233176538:233176733(-)	5p	196	-47.9	GUUUGAUUUAAGGUUAAAGUA	21	11
zma-miRds118a	chr5	10977918:10978089(+)	3p	172	-68.8	UCUAAAGGUCCAGGAGGCUCG	21	28	AGCAUCCUAGACCUUUAGAUC	5p	2
zma-miRds118b	chr5	11054552:11054739(+)	3p	188	-79.2	UCUAAAGGUCCAGGAGGCUCG	21	28	GCCUCCUAGACCUUUAGAUCG	5p	5
zma-miRds119	chr5	21298029:21298361(+)	3p	333	-114	AAGUGAGGAUGGGAUUAUCUGC	22	12
zma-miRds123	chr5	151183488:151183580(+)	3p	93	-18.5	UCUAAACAAAAGUAGAAGUUC	21	15
zma-miRds125a	chr5	182248069:182248242(+)	3p	174	-46.7	UCACGUCGUCUCUACAUCCGU	21	45
zma-miRds125b	chr6	150074004:150074352(-)	5p	349	-174.4	UCACGUCGUCUCUACAUCCGU	21	45
zma-miRds126a	chr5	187193566:187193888(+)	3p	323	-231.8	AGCGGACUCUUGUCGGUGGGU	21	256
zma-miRds126b	chr5	187193567:187193889(-)	3p	323	-253.7	AGCGGACUCUUGUCGGUGGGU	21	256
zma-miRds127	chr5	215824929:215825058(+)	5p	130	-72	UUGAGAGUAAGUGGAAUGGAG	21	11
zma-miRds128	chr5	7688815:7688926(-)	5p	112	-42.9	UGAAACUGUCACAGCAUGAUCUA	23	12
zma-miRds129	chr5	31655052:31655264(-)	3p	213	-74.99	UCAUGUAGUUCAGAUUAGAAG	21	17
zma-miRds130	chr5	55792458:55792797(-)	5p	340	-102.2	UUAACGGGUAGAGAAUCUUCU	21	26
zma-miRds133	chr5	114299026:114299100(-)	5p	75	-27.6	UUCACCUCCCGGACAGGUAUG	21	25
zma-miRds138	chr6	31100524:31100660(+)	5p	137	-35.24	UAAGGAUUAAAGGAAAACCGGA	22	17
zma-miRds141	chr6	88916038:88916106(+)	3p	69	-24.7	AAGAGAAGGUUGACACAUGUU	21	10
zma-miRds142	chr6	110414133:110414365(+)	3p	233	-46.7	UAGAAAAUAUUUAGGACAUCUG	22	59
zma-miRds145a	chr6	160765793:160765956(+)	5p	164	-40.6	GCAAGCAAGAUUGGUCGGAU	20	14
zma-miRds145b	chr9	33455082:33455287(-)	3p	206	-64.6	GCAAGCAAGAUUGGUCGGAU	20	14	UUGGACAUCUUGUUUGGGC	5p	2
zma-miRds146	chr6	44384157:44384255(-)	5p	99	-73.4	CAAUACACAUGGGUUGAGGAG	21	17
zma-miRds148	chr6	93892182:93892339(-)	3p	158	-73.6	GGUCCCCGGCAACGGCGCCA	20	193
zma-miRds149	chr6	138954340:138954669(-)	5p	330	-125.4	UUGGAUGUCGAUAUUGAGGGCA	22	14
zma-miRds150a	chr6	160766404:160766487(-)	3p	84	-24.9	UACAGAAUGGUAAAGAGGGCUC	22	11
zma-miRds150b	chrPt	38531:38614(+)	3p	84	-24.9	UACAGAAUGGUAAAGAGGGCUC	22	11
zma-miRds151	chr7	85853446:85853591(+)	5p	146	-66.9	UCAGAAAAUAUGAACUUGAGA	21	225
zma-miRds153	chr7	147720271:147720447(+)	5p	177	-69.5	UCUGGACCAGUUGAACGGGCC	21	11
zma-miRds155	chr7	176444939:176445030(+)	5p	92	-22.6	UUGAUGUAGUUAGUACUCAGG	21	10
zma-miRds156	chr7	132199256:132199463(-)	5p	208	-77.3	GAGCGUGGCGCUAGAGUCGGUG	22	13
zma-miRds159	chr7	150369311:150369507(-)	3p	197	-41	GACGCUACGGACUUGAUUGUAU	22	10
zma-miRds160	chr7	161831700:161831861(-)	3p	162	-85.8	UGAAAGGCGGAUGGCUCUCUA	21	111
zma-miRds170	chr8	150875669:150875913(-)	3p	245	-64.13	AUCAACUUAAACUUUUGGGUUG	22	10
zma-miRds171	chr8	158370513:158370653(-)	5p	141	-56.1	CCUUGCUUCGGCGGUGGACGCA	22	29
zma-miRds172	chr8	165098140:165098203(-)	5p	64	-20.2	CAGCUGAGCAAUUUUCUGGAC	21	12
zma-miRds173	chr9	7578985:7579084(+)	5p	100	-67.8	UCAUGGAUUGUCAUAAUCUAG	21	39
zma-miRds178	chr9	138790622:138790775(+)	5p	154	-76.24	UUUGGAUCUAGAAUCAAAGGC	21	84
zma-miRds179	chr9	149172218:149172313(+)	5p	96	-36.7	AAGUGGAUUGAGGUGUAUUGAGA	23	12
zma-miRds180a	chr9	6937034:6937177(-)	3p	144	-52.5	UUCGUAUUUUAGUAGAGGAGG	21	10
zma-miRds180b	chrMt	87012:87155(-)	3p	144	-52.5	UUCGUAUUUUAGUAGAGGAGG	21	10
zma-miRds184	chr9	140891127:140891388(-)	3p	-262	-69.2	UGGAUUGUAGGGGCUAGAAU	20	13
DS: dry seed, L: length.
