# Supplementary material for: Deep Sequencing of Maize Small RNAs Reveals a Diverse Set of MicroRNA in Dry and Imbibed Seeds
Source: PLoS One. 2013 Jan 24;8(1):e55107. doi: 10.1371/journal.pone.0055107 (PMC3554676; doi:10.1371/journal.pone.0055107)
Supplement: Additional File S12 — Primers used for predicted miRNAs targets qRT-PCR. (XLS) [file pone.0055107.s012.xls]

## Sheet: Sheet1
Additional file S12: Primers used for predicted miRNAs targets qRT-PCR
MiRNA-ID	Gene-ID	Primer	Sequence (from 5' to 3')
zma-MIR156a-l	GRMZM2G097275	Forward primer	CCAAGGTGGTTGTTGCTGGT
		Reverse primer	GCATTGTGATCATTGAGGCG
	GRMZM2G414805	Forward primer	ACAATCGCAAGCACAAGGTC
		Reverse primer	AGACGCCTACGACAGCTTCG
zma-miR164a-d/f-h	GRMZM2G114850	Forward primer	CCGGGTACTGGAAGGCGAC
		Reverse primer	TTGGATGAGGAGGGTTGGT
zma-MIR164a-h	GRMZM2G146380	Forward primer	AGACGCTCGTCTTCTACACG
		Reverse primer	CGACGATGACCTCTTGCTG
zma-MIR166a-i/l/m	GRMZM2G003509	Forward primer	ATAAGAGCTGAGGTGCTTCC
		Reverse primer	GTGCAATTTGCCTAATGTGA
	GRMZM2G109987	Forward primer	TGAAGGTCAGCCTCTTACTC
		Reverse primer	TCAAGTGGTATGACACGAAA
zma-miR167e/f/g/h/I/j	GRMZM2G028980	Forward primer	CCATCTCCTTTTGCTCTTGG
		Reverse primer	TGCTTTGTAATGCTGCTGCT
	GRMZM2G089640	Forward primer	CCCGTATATCTGTGGGGATG
		Reverse primer	ACGTTGGGAAAGTTGTCAGG
zma-MIR168a/b	AC209206.3_FGT011	Forward primer	TTCAAGTGGCACCAGCATCA
		Reverse primer	TCACCCATGACAGCACGATT
	GRMZM2G441583	Forward primer	TGGAGCATTGCCATTTACTT
		Reverse primer	CTCTTGAGGAGCATCTGGTT
zma-miR169a-d/i-l/p/r	GRMZM2G000686	Forward primer	CCCATATGCCGATCCATACT
		Reverse primer	CTGCTTCGCGTTGACATAGA
zma-MIR319a/b/c/d	GRMZM2G028054	Forward primer	CGCCTCATCATCCAGCTCCA
		Reverse primer	CACCAGCAGGATAGATAGGA
	GRMZM2G139688	Forward primer	GCCTCATCATCCAGCTCCAC
		Reverse primer	GGAAGGCTAGCTCGTTGACA
zma-miR393b/c	GRMZM2G135978	Forward primer	CTGTTGTGGCATCGTCTTGT
		Reverse primer	TGGTAATAAGGGCCTCGTTG
zma-MIR408/b	GRMZM2G384327	Forward primer	AAGGAGGCTGAAGCATCGAA
		Reverse primer	AAGCTGATGCAGGTGTCTGA
zma-MIR528a/b	GRMZM2G146240	Forward primer	TATGCTATGTCTTCGGAATC
		Reverse primer	CTCGCTAAAGAATGTTGGTA
zma-miRn6	GRMZM2G091243	Forward primer	GATAATTTCAGTAGCACCCT
		Reverse primer	GAGCACATAGACCTCCATAA
Actin	GRMZM2G126010	Forward primer	AATGCCCAGCAATGTATGT
		Reverse primer	ATTAGGTGGTCGGTGAGGT
